# Supplementary material for: Mass spectrometry imaging for in situ kinetic histochemistry
Source: PubMed Central journal article supplement — Sci Rep. 2013 Apr 15;3:1656. doi: 10.1038/srep01656 (PMC3625901; doi:10.1038/srep01656), 2013-04-15
Supplement: srep01656-s1.pdf [file srep01656-s1.pdf]

1 **Mass spectrometry imaging for *in situ* kinetic histochemistry**

2 Katherine B. Louie<sup>1§</sup>, Benjamin P. Bowen<sup>1§</sup>, Stephanie McAlhany<sup>3</sup>, Yurong Huang<sup>1</sup>, John C.  
3 Price<sup>4</sup>, Jian-hua Mao<sup>1</sup>, Marc Hellerstein<sup>2,3,4</sup> and Trent R. Northen<sup>1\*</sup>

4 **SUPPLEMENTARY TABLES AND FIGURES**

5  
6 **Serum Deuterium Enrichment**

| Sample                          | Average Atom % D |
|---------------------------------|------------------|
| Serum, deuterium-enriched mouse | 4.50             |
| Serum, control mouse            | 0.0149           |

7  
8 **Supplementary Table S1. Measurement of atom% D in body water.** To rapidly achieve a  
9 stable concentration of <sup>2</sup>H<sub>2</sub>O in body water, a concentrated bolus dose of <sup>2</sup>H<sub>2</sub>O followed by 8%  
10 <sup>2</sup>H<sub>2</sub>O in drinking water was administered to a tumor-bearing mouse<sup>1</sup>. After 5 days, this resulted  
11 in final body water enrichment of 4.5 atom% <sup>2</sup>H, as measured using cavity ringdown  
12 spectroscopy. This value is comparable to previous studies for the given dosage of <sup>2</sup>H<sub>2</sub>O in  
13 drinking water<sup>2</sup>. Since body water serves as the precursor pool of deuterated water used in active  
14 metabolism, atom% <sup>2</sup>H provides a measure of the fractional amount of hydrogen atoms on a  
15 molecule capable of being metabolically replaced with <sup>2</sup>H<sup>3</sup>.

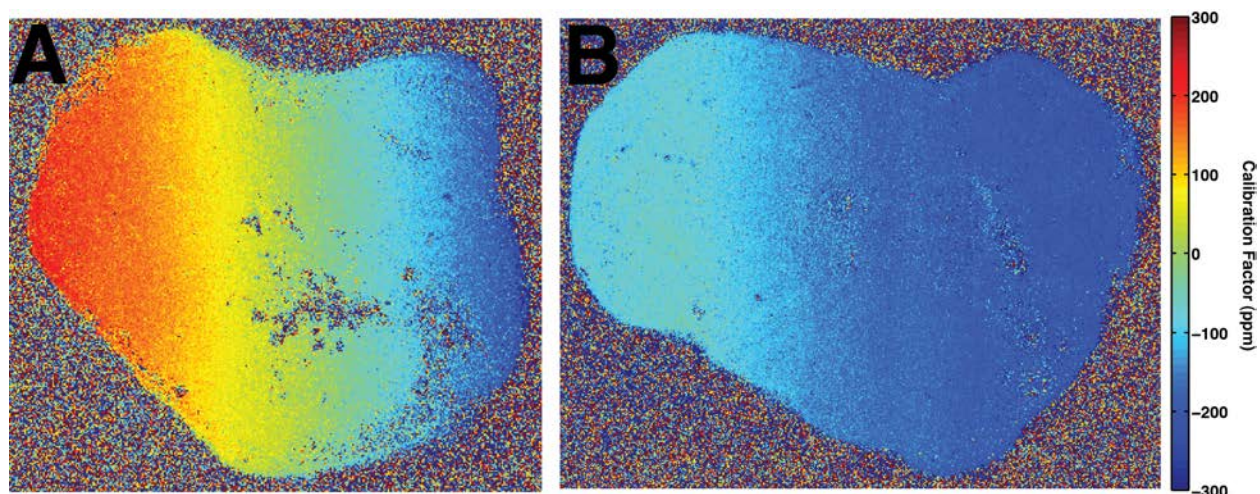

19  
20 **Supplementary Figure S1.** These images plot the calibration factor implemented for each pixel  
21 in the (A) control, unlabeled tumor and (B) deuterium-enriched tumor. The calibration factor is  
22 calculated as the required shift in each measured spectrum that minimizes the distance between  
23 the measured and reference masses.

25

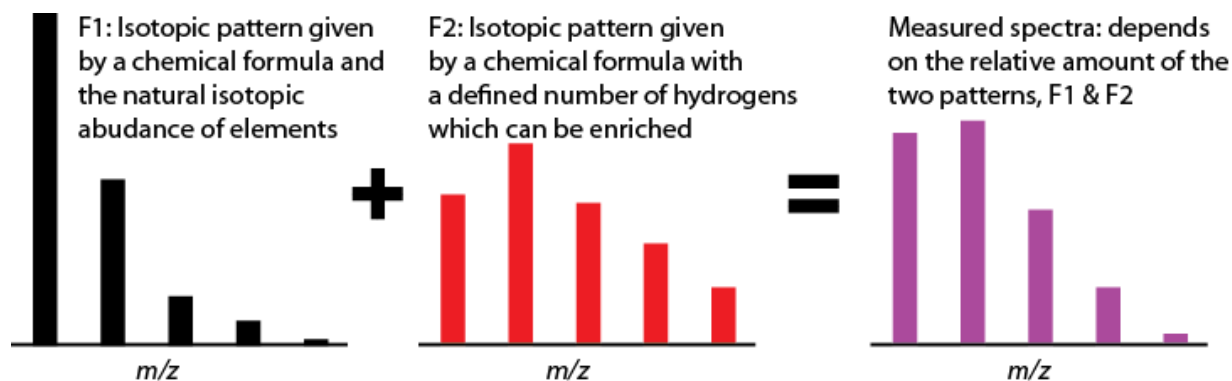

26

27 **Supplementary Figure S2.** For each of the 45 lipid species considered in this study, two  
 28 patterns are required to model the observed data: (1) the natural isotopic pattern for each  
 29 compound,  $F1_i$  and (2) the enriched isotopic pattern for each compound,  $F2_i$ . The linear  
 30 coefficients of these 90 patterns (2 for each lipid species –  $^2\text{H}$ -labeled vs. unlabeled) and an  
 31 offset term were solved by least-squares fitting in which the coefficients were subject to non-  
 32 negativity constraints for each pixel.

33

34 **Validation of values for  $N$ .** To evaluate selected values of  $N$  for each lipid, the isotopic  
 35 enrichment model was also implemented using alternate values of  $N$ . Quality of fit over a range  
 36 of values was tested by shifting or scaling the values of  $N$  (**Supplementary Fig. S3**) by  $\pm 50\%$   
 37 or  $\pm 15$ , respectively. Spectra with pixels having total intensity in the top 5<sup>th</sup> percentile were  
 38 modeled by non-negative least squares fitting of the isotopic enrichment model. Plots in  
 39 Supplementary Fig. S3 show the average error minima is within only 5% or 2 hydrogen atoms  
 40 from our selected values for  $N$ .

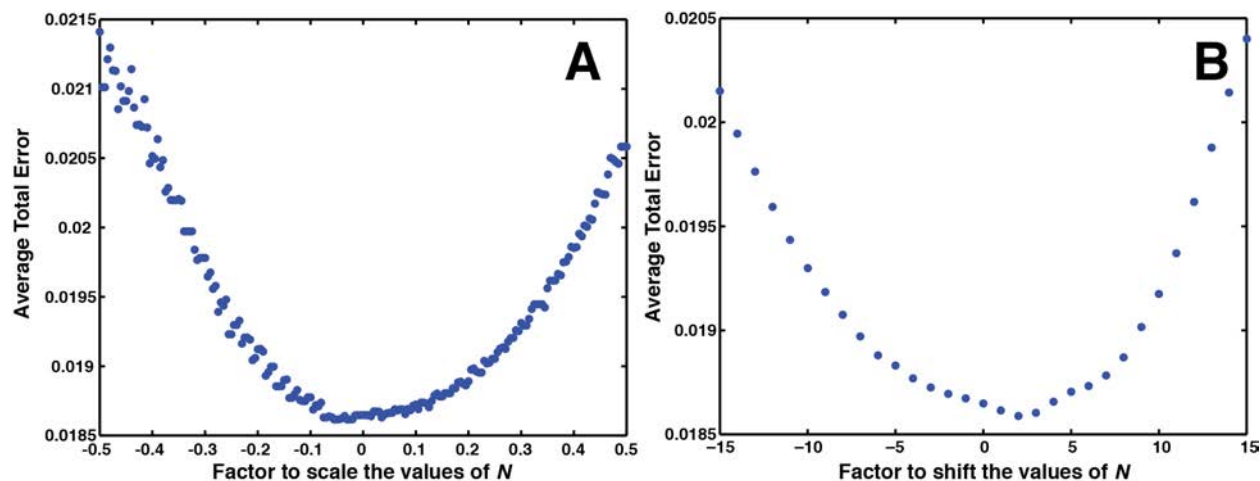

41

42

43 **Supplementary Figure S3.** Calculation of error using alternate values of  $N$ , the maximum  
 44 number of hydrogen sites originating from water. In panel **A**, alternative values of  $N$   
 45 are calculated by scaling the original values by a factor ( $\pm 50\%$ ). Modifying  $N$  by approximately  
 46  $\pm 10\%$  has little effect on the overall quality of the fit. In panel **B**, new values of  $N$   
 47 are calculated by directly adding or subtracting  $\pm 15$  hydrogens to each value of  $N$  in the model.  
 48 Modifying  $N$  by approximately  $\pm 5$  has little effect on the overall quality of the fit.



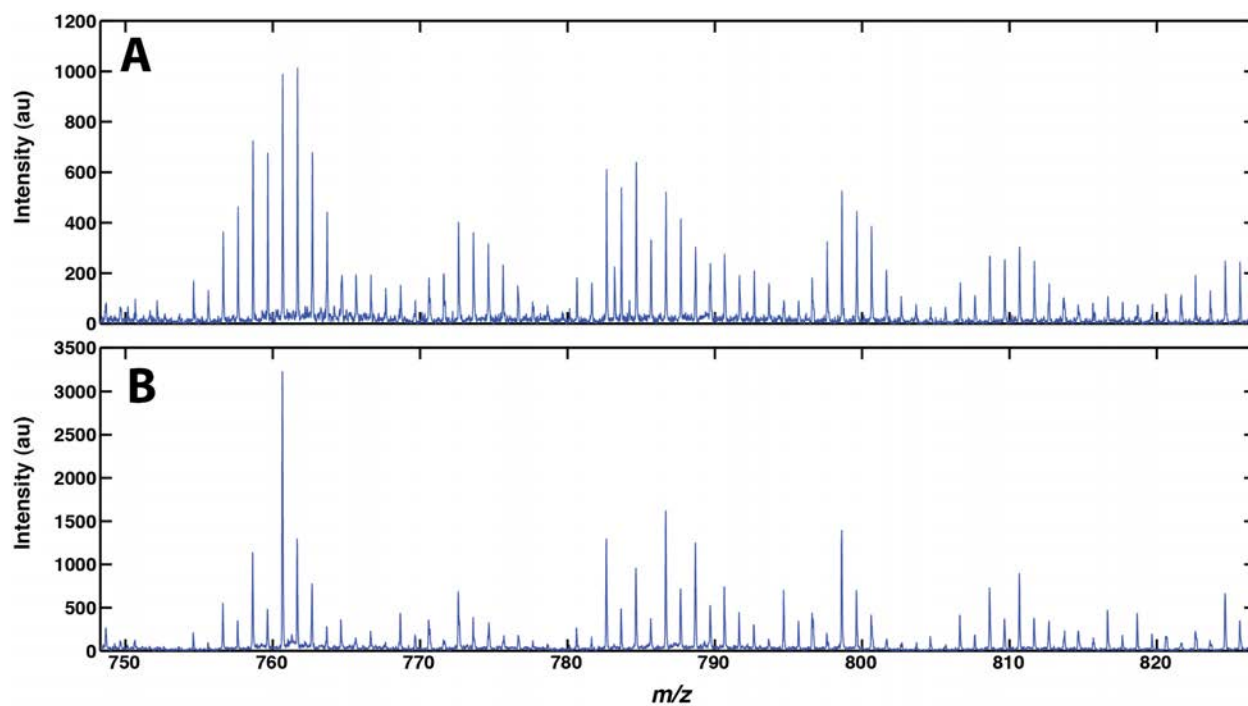

51  
52 **Supplementary Figure S4.** Mass spectra generated from extracts spotted directly onto a NIMS  
53 chip from a (A) labeled and (B) unlabeled tumor. By visual inspection, the frequency in which  
54 the M1 isotopologue's intensity is either greater or near to the M0 isotopologue's (monoisotopic  
55 mass) intensity indicates deuterium enrichment in the labeled tumor and not in the unlabeled.

56 **Identified lipid species detected in tumor**

| #      | Compound ID | Monoisotopic mass  |                    | Chemical Formula | N  | Normalized Abundance (0-1) | Mass error (ppm)   |                      | Fragments (MS/MS, PSD) |
|--------|-------------|--------------------|--------------------|------------------|----|----------------------------|--------------------|----------------------|------------------------|
|        |             | [M+H] <sup>+</sup> | [M+K] <sup>+</sup> |                  |    |                            | NIMS, tumor tissue | LC/MS, tumor extract |                        |
| 1-a    | PC(34:05)   | 752.5225           | 790.4784           | C42H74NO8P       | 30 | 0.052                      | 3.5                | 3.4                  | 184                    |
| 1-b    | PE(P-38:04) | 752.5589           | 790.5148           | C43H78NO7P       | 39 | 0.022                      | 49.6               | 0.1                  |                        |
| 2-a    | PC(34:04)   | 754.5381           | 792.4940           | C42H76NO8P       | 33 | 0.042                      | 4.8                | 4.4                  | 184                    |
| 3-a    | PC(34:03)   | 756.5538           | 794.5097           | C42H78NO8P       | 36 | 0.175                      | 2.7                | 0.5                  | 184                    |
| 4-a    | PC(34:02)   | 758.5694           | 796.5253           | C42H80NO8P       | 39 | 1.000                      | 2.4                | 2.3                  | 184                    |
| 4-b    | PS(34:03)   | 758.4967           | 796.4526           | C40H72NO10P      | 35 | 0.018                      | 1174.5             | 14.8                 |                        |
| 5-a    | PC(34:01)   | 760.5851           | 798.5410           | C42H82NO8P       | 42 | 0.894                      | 26.9               | 1.9                  | 184                    |
| 5-b    | PS(34:02)   | 760.5123           | 798.4682           | C40H74NO10P      | 39 | 0.018                      | 64.2               | 2.6                  |                        |
| 6-a    | PC(34:00)   | 762.6007           | 800.5566           | C42H84NO8P       | 45 | 0.026                      | 72.0               | 0.6                  | 184                    |
| 6-b    | PS(34:01)   | 762.5280           | 800.4839           | C40H76NO10P      | 42 | 0.026                      | 18.9               | 0.7                  |                        |
| 7-b    | PE(38:06)   | 764.5225           | 802.4784           | C43H74NO8P       | 33 | 0.017                      | 41.0               | 10.2                 |                        |
| 7-a    | PS(34:00)   | 764.5436           | 802.4995           | C40H78NO10P      | 45 | 0.009                      | 14.7               | 1.1                  |                        |
| 8-a    | PE(38:05)   | 766.5381           | 804.4940           | C43H76NO8P       | 36 | 0.079                      | 39.8               | 0.4                  | -141(NL)               |
| 8-b    | PC(P-36:04) | 766.5745           | 804.5304           | C44H80NO7P       | 36 | 0.046                      | 5.4                | 5.6                  | 184                    |
| 9-b    | PE(38:04)   | 768.5538           | 806.5097           | C43H78NO8P       | 39 | 0.083                      | 41.8               | 0.5                  | -141(NL)               |
| 9-a    | PC(P-36:03) | 768.5902           | 806.5461           | C44H82NO7P       | 39 | 0.080                      | 3.3                | 1.6                  | 184                    |
| 10-a   | PC(P-36:02) | 770.6058           | 808.5617           | C44H84NO7P       | 42 | 0.010                      | 16.9               | 45.5                 | 184                    |
| 11-a   | PE(38:02)   | 772.5851           | 810.5410           | C43H82NO8P       | 45 | 0.021                      | 1.2                | 1.0                  |                        |
| 11-b   | PC(P-36:01) | 772.6215           | 810.5774           | C44H86NO7P       | 45 | 0.014                      | 46.1               | 6.4                  | 184                    |
| 12-a   | PE(P-40:07) | 774.5432           | 812.4991           | C47H80NO7P       | 33 | 0.052                      | 62.1               | 7.9                  |                        |
| 12-b   | PE(38:01)   | 774.6007           | 812.5566           | C43H84NO8P       | 48 | 0.010                      | 8.7                | 7.5                  |                        |
| 13-a   | PE(P-40:06) | 776.5589           | 814.5148           | C47H82NO7P       | 36 | 0.007                      | 20.1               | 19.7                 |                        |
| 14-a   | PC(36:06)   | 778.5381           | 816.4940           | C44H76NO8P       | 30 | 0.017                      | 7.2                | 4.3                  |                        |
| 15-a   | PC(36:05)   | 780.5538           | 818.5097           | C44H78NO8P       | 33 | 0.143                      | 9.9                | 0.2                  | 184                    |
| 16-a   | PC(36:04)   | 782.5694           | 820.5253           | C44H80NO8P       | 36 | 0.798                      | 5.2                | 1.9                  | 184                    |
| 17-a   | PC(36:03)   | 784.5751           | 822.5310           | C44H82NO8P       | 39 | 0.436                      | 14.6               | 14.9                 | 184                    |
| 17-b   | PS(36:04)   | 784.5123           | 822.4682           | C42H74NO10P      | 36 | 0.014                      | 90.9               | 0.9                  |                        |
| 18-a   | PC(36:02)   | 786.6007           | 824.5566           | C44H84NO8P       | 42 | 0.265                      | 24.2               | 2.8                  | 184                    |
| 18-b   | PS(36:03)   | 786.5280           | 824.4839           | C42H76NO10P      | 39 | 0.013                      | 64.1               | 4.7                  |                        |
| 19-a   | PS(36:02)   | 788.5436           | 826.4995           | C42H78NO10P      | 42 | 0.094                      | 21.7               | 2.0                  |                        |
| 19-b   | PC(36:01)   | 788.6164           | 826.5723           | C44H86NO8P       | 45 | 0.069                      | 66.3               | 2.4                  | 184                    |
| 20-a   | PS(36:01)   | 790.5593           | 828.5152           | C42H80NO10P      | 45 | 0.076                      | 19.6               | 0.7                  |                        |
| 21-a   | PC(P-38:05) | 792.5902           | 830.5461           | C46H82NO7P       | 36 | 0.050                      | 2.1                | 0.6                  | 184                    |
| 21-b   | PS(36:00)   | 792.5749           | 830.5308           | C42H82NO10P      | 48 | 0.015                      | 20.4               | 0.3                  |                        |
| 22-a   | PC(P-38:04) | 794.6058           | 832.5617           | C46H84NO7P       | 39 | 0.124                      | 12.6               | 0.1                  | 184                    |
| 23-a   | PE(40:04)   | 796.5851           | 834.5410           | C45H82NO8P       | 42 | 0.017                      | 0.7                | 3.8                  |                        |
| 23-b   | PC(P-38:03) | 796.6215           | 834.5774           | C46H86NO7P       | 42 | 0.014                      | 42.9               | 1.2                  | 184                    |
| 24-a   | PC(P-38:02) | 798.6371           | 836.5930           | C46H88NO7P       | 45 | 0.002                      | 51.7               | 10.4                 | 184                    |
| 25-a   | PE(40:02)   | 800.6164           | 838.5723           | C45H86NO8P       | 48 | 0.003                      | 32.6               | 2.8                  |                        |
| 26-a   | PC(38:08)   | 802.5381           | 840.4940           | C46H76NO8P       | 27 | 0.037                      | 2.3                | 4.6                  | 184                    |
| 27-a   | PC(38:07)   | 804.5538           | 842.5097           | C46H78NO8P       | 30 | 0.022                      | 2.0                | 2.6                  | 184                    |
| 28-a   | PC(38:06)   | 806.5694           | 844.5253           | C46H80NO8P       | 33 | 0.120                      | 4.5                | 1.4                  | 184                    |
| 29-a   | PC(38:05)   | 808.5851           | 846.5410           | C46H82NO8P       | 36 | 0.279                      | 8.5                | 0.6                  | 184                    |
| 30-a   | PC(38:04)   | 810.6007           | 848.5566           | C46H84NO8P       | 39 | 0.260                      | 18.7               | 1.1                  | 184                    |
| 30.5-b | SM(d42:03)  | 811.6688           | 849.6247           | C47H91N2O6P      | 53 | 0.025                      | 84.5               | 15.5                 |                        |
| 31-a   | PS(38:04)   | 812.5436           | 850.4995           | C44H78NO10P      | 39 | 0.158                      | 41.2               | 0.8                  |                        |
| 31-b   | PE(P-42:02) | 812.6528           | 850.6087           | C47H90NO7P       | 53 | 0.107                      | 87.1               | 1.0                  |                        |
| 31.5-b | SM(d42:02)  | 813.6844           | 851.6403           | C47H93N2O6P      | 56 | 0.042                      | 126.8              | 2.8                  |                        |
| 32-a   | PS(38:03)   | 814.5593           | 852.5152           | C44H80NO10P      | 42 | 0.028                      | 18.2               | 1.8                  |                        |
| 32.5-b | SM(d42:01)  | 815.7001           | 853.6560           | C47H95N2O6P      | 59 | 0.008                      | 129.6              | 1.0                  |                        |
| 33-a   | PC(P-40:07) | 816.5902           | 854.5461           | C48H82NO7P       | 33 | 0.014                      | 1.5                | 3.1                  | 184                    |
| 34-a   | PC(P-40:06) | 818.6058           | 856.5617           | C48H84NO7P       | 36 | 0.028                      | 0.5                | 0.4                  | 184                    |
| 35-a   | PC(P-40:05) | 820.6215           | 858.5774           | C48H86NO7P       | 39 | 0.008                      | 15.0               | 13.3                 | 184                    |
| 36-a   | PC(P-40:04) | 822.6371           | 860.5930           | C48H88NO7P       | 42 | 0.007                      | 63.1               | 4.3                  | 184                    |
| 37-a   | PC(P-40:03) | 824.6528           | 862.6087           | C48H90NO7P       | 45 | 0.004                      | 108.4              | 19.1                 |                        |
| 38-a   | PC(40:10)   | 826.5381           | 864.4940           | C48H76NO8P       | 24 | 0.003                      | 0.2                | 34.2                 |                        |
| 39-a   | PC(40:09)   | 828.5538           | 866.5097           | C48H78NO8P       | 27 | 0.007                      | 3.9                | 11.5                 | 184                    |
| 40-a   | PC(40:08)   | 830.5694           | 868.5253           | C48H80NO8P       | 30 | 0.139                      | 4.8                | 0.2                  |                        |
| 41-a   | PC(40:07)   | 832.5851           | 870.5410           | C48H82NO8P       | 33 | 0.038                      | 3.2                | 0.3                  |                        |
| 42-a   | PC(40:06)   | 834.5983           | 872.5542           | C48H84NO8P       | 36 | 0.025                      | 4.0                | 0.1                  |                        |
| 43-a   | PS(40:06)   | 836.5436           | 874.4995           | C46H78NO10P      | 36 | 0.063                      | 73.4               | 0.6                  |                        |
| 43-b   | PC(40:05)   | 836.6091           | 874.5650           | C48H86NO8P       | 39 | 0.023                      | 1.5                | 7.2                  |                        |
| 44-a   | PS(40:05)   | 838.5593           | 876.5152           | C46H80NO10P      | 39 | 0.021                      | 28.8               | 1.0                  |                        |
| 44-b   | PC(40:04)   | 838.6320           | 876.5879           | C48H88NO8P       | 42 | 0.008                      | 54.2               | 0.9                  |                        |
| 45-a   | PS(40:04)   | 840.5749           | 878.5308           | C46H82NO10P      | 42 | 0.026                      | 4.9                | 0.5                  |                        |

58 **Supplementary Table S2.** Identified phospholipid compounds in tumor mass spectra. The  
59 monoisotopic mass of each identified compound is shown for both  $[M+H]^+$  and  $[M+K]^+$  adducts.  
60 The mass error, or difference between measured mass and monoisotopic mass (ppm), is shown  
61 for mass spectra from direct NIMS imaging (comparing  $[M+K]^+$  adducts) of tumor tissue and  
62 LC/MS (comparing  $[M+H]^+$  adducts) of tumor extract. Values  $<30$ ppm are shaded, with values  
63  $<5$ ppm in bold. The last column shows detection of the characteristic fragment ions ( $m/z = 184$   
64 for PC, neutral loss of  $-141$  for PE) using LC/MS/MS or post source decay (PSD). Values of  $N$   
65 used in the model of isotopic enrichment are also shown. The relative levels of each lipid in the  
66 tumor extract are also shown.

67

68

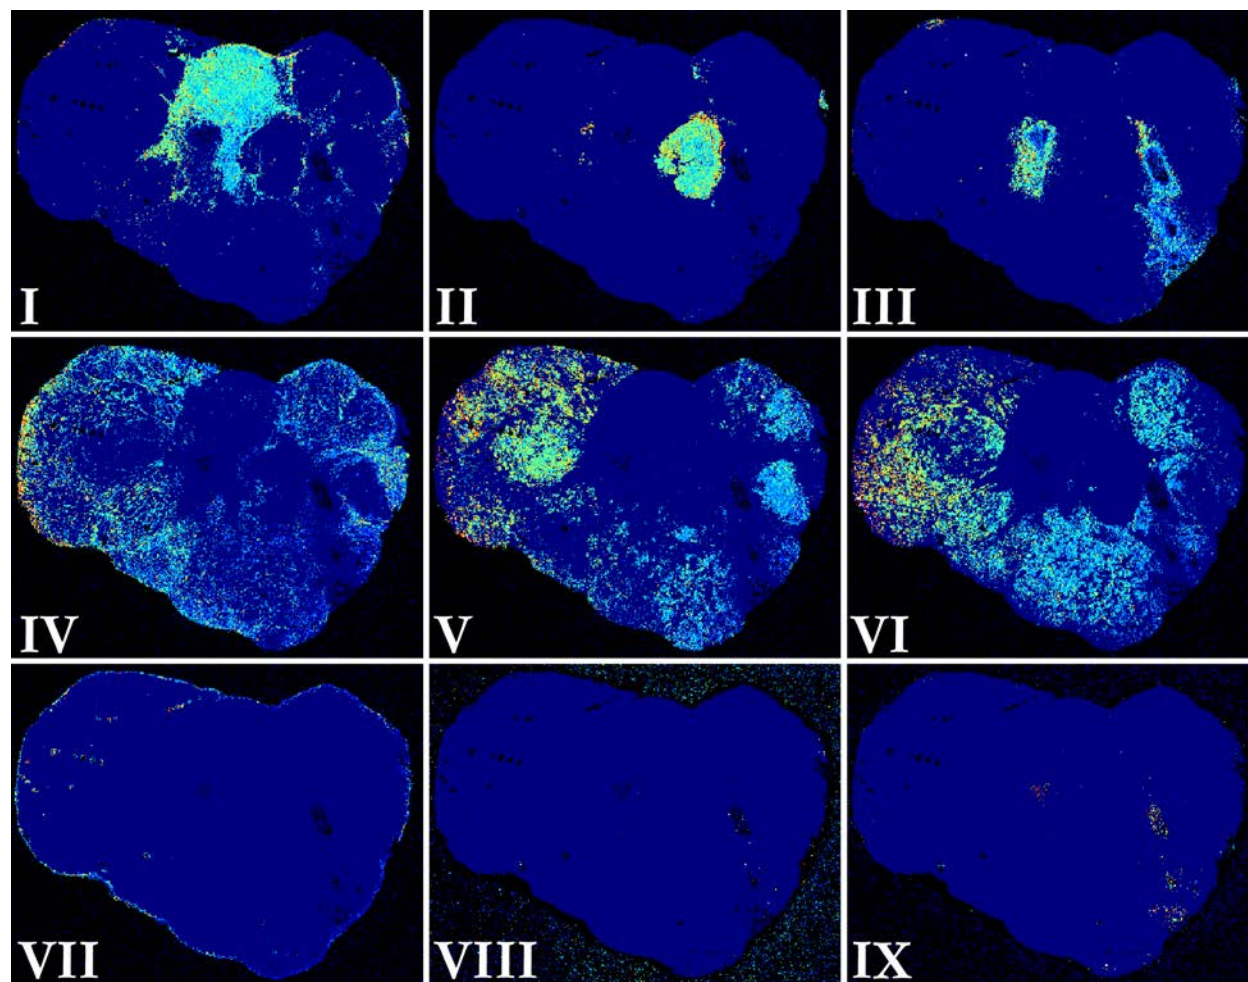

69

70

71 **Supplementary Figure S5.** Images of the nine regions identified in the deuterium-enriched  
72 tumor by applying K-means analysis. This approach identified 3 regions associated with  
73 background (Regions VII-IX) and 6 regions associated with the tumor (Regions I-VI).

74

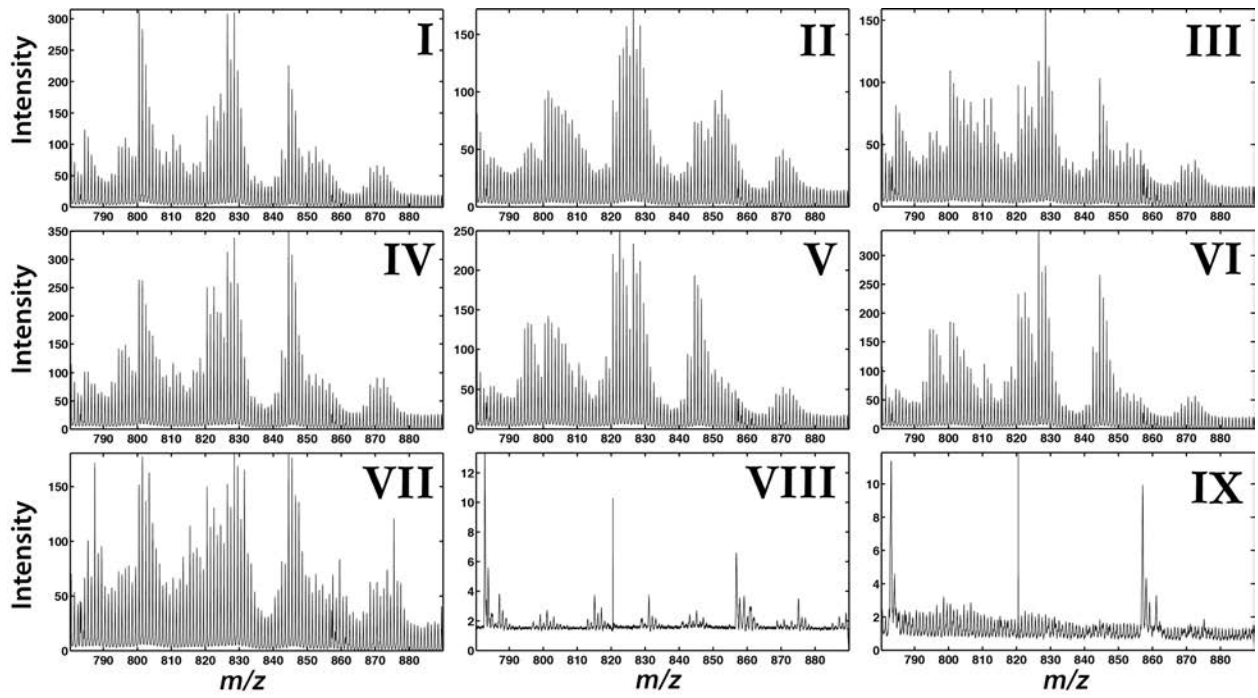

75  
76  
77  
78  
79

**Supplementary Figure S6.** Average spectra corresponding to the nine regions identified in the deuterium-enriched tumor by applying K-means analysis.



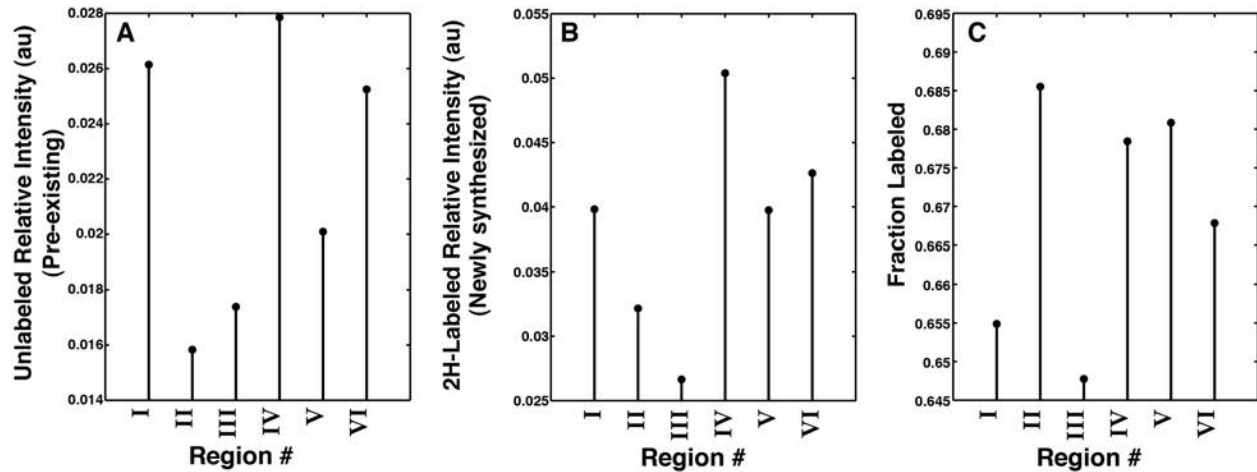

80  
 81  
 82  
 83  
 84  
 85  
 86  
 87  
 88  
 89  
 90

**Supplementary Figure S7.** To compare relative levels of new synthesis and turnover between K-means regions, the normalized, average intensity originating from (A) unlabeled and (B)  $^2\text{H}$ -labeled lipids is shown for Regions I-VI. Panel (C) plots the *fraction* of total signal originating from newly synthesized (labeled) lipids for each region. Region II, characterized as having high grade features of malignancy according to H&E, has the lowest levels of pre-existing lipids (Panel A) and the highest fraction of newly synthesized lipids (Panel C). Region III, characterized as necrotic according to H&E, has the lowest levels of newly synthesized lipids overall (Panel B).

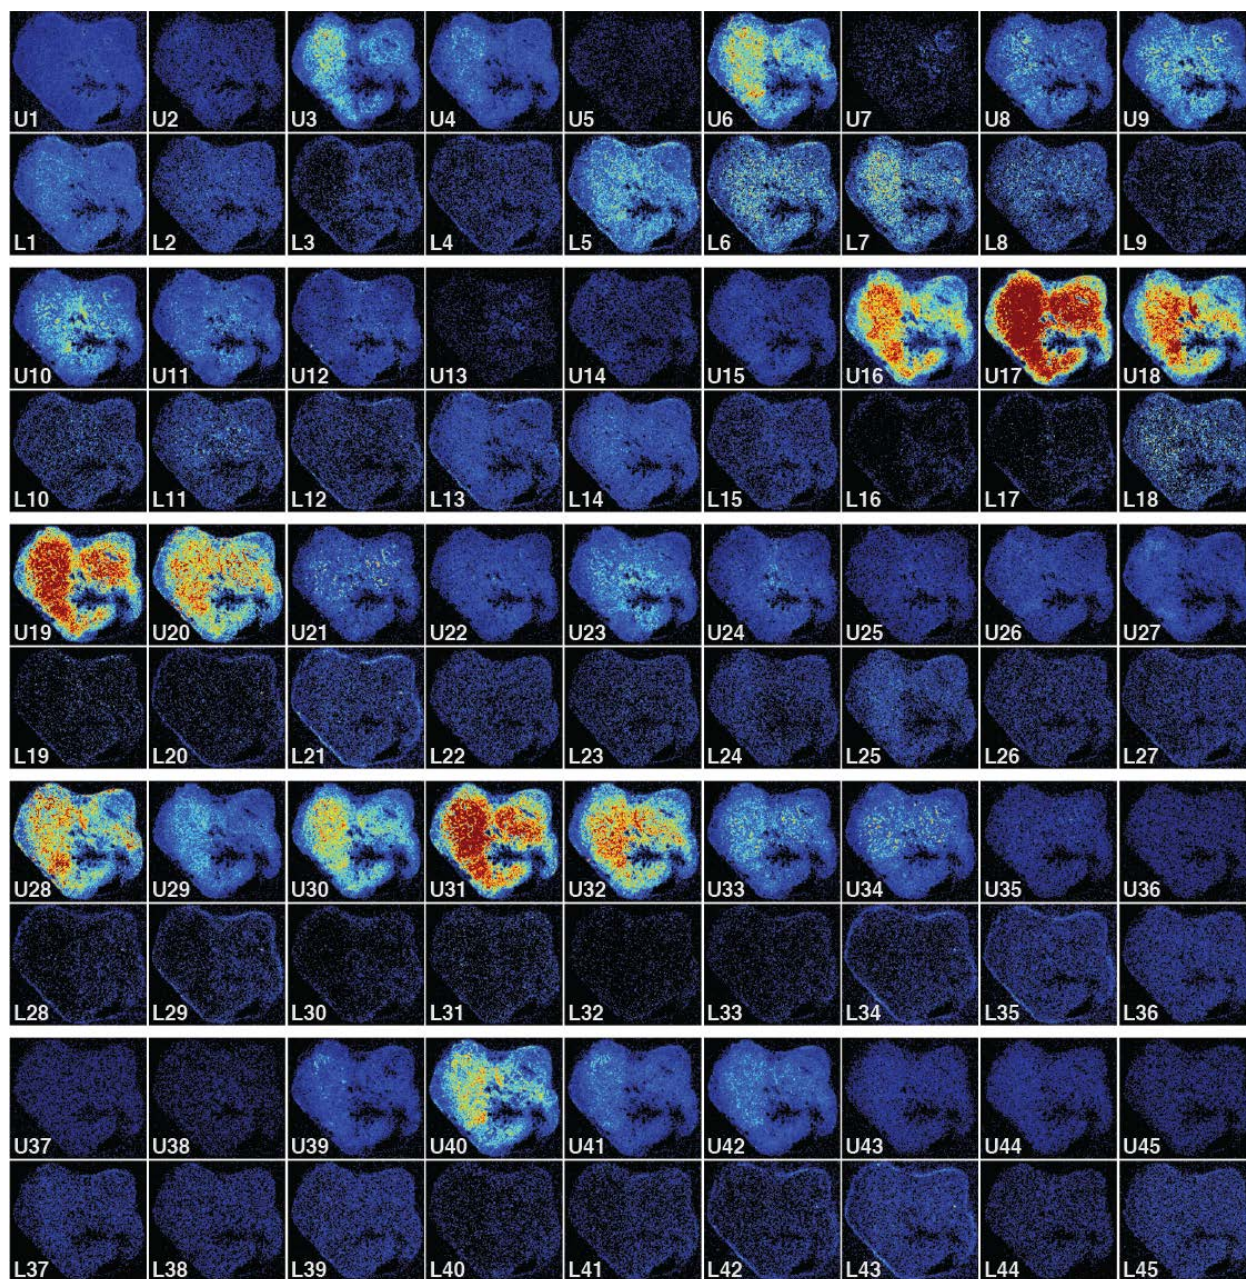

91  
 92 **Supplementary Figure S8.** Intensity images of the **unlabeled, control tumor** for the 45  
 93 phospholipids identified in this study, where each column represents a unique lipid. For each  
 94 block, the top row is unlabeled (pre-existing) and bottom row is  $^2\text{H}$ -labeled (newly synthesized).  
 95 The false color scale indicates the relative level of each lipid, maximally labeled or unlabeled,  
 96 distributed throughout the tissue. Image subscripts link to Supplementary Table 2 corresponding  
 97 to specific lipid species. U=unlabeled, L= labeled, F=fraction labeled.  
 98

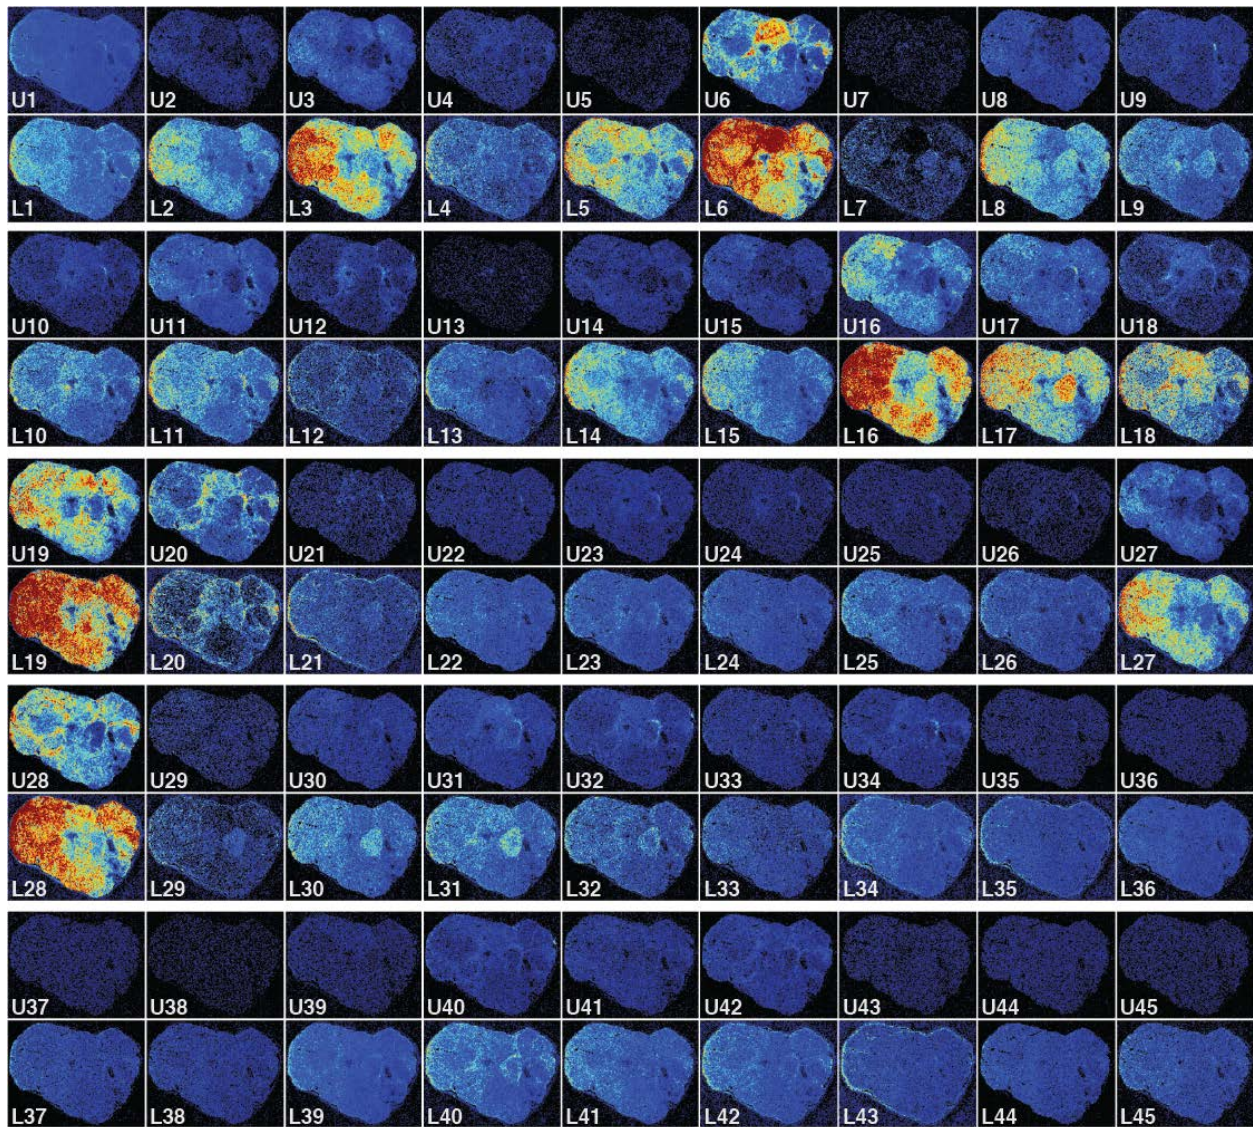

99  
100

101 **Supplementary Figure S9.** Intensity images of the **deuterium-enriched tumor** for the 45  
 102 phospholipids identified in this study, where each column represents a unique lipid. For each  
 103 block, the top row is unlabeled (pre-existing) and bottom row is  $^2\text{H}$ -labeled (newly synthesized).  
 104 The false color scale indicates the relative level of each lipid, maximally labeled or unlabeled,  
 105 distributed throughout the tissue. Image subscripts link to Supplementary Table 2 corresponding  
 106 to specific lipid species. U=unlabeled, L= labeled, F=fraction labeled.

107  
108  
109

110 **Histopathology findings.** Results from the blinded histopathology examination of the H&E  
111 stain of the deuterium-enriched tumor.

112  
113 All tissue represents tumor with no normal appearing breast parenchyma. Below are three  
114 figures with specific findings associated with each figure.  
115

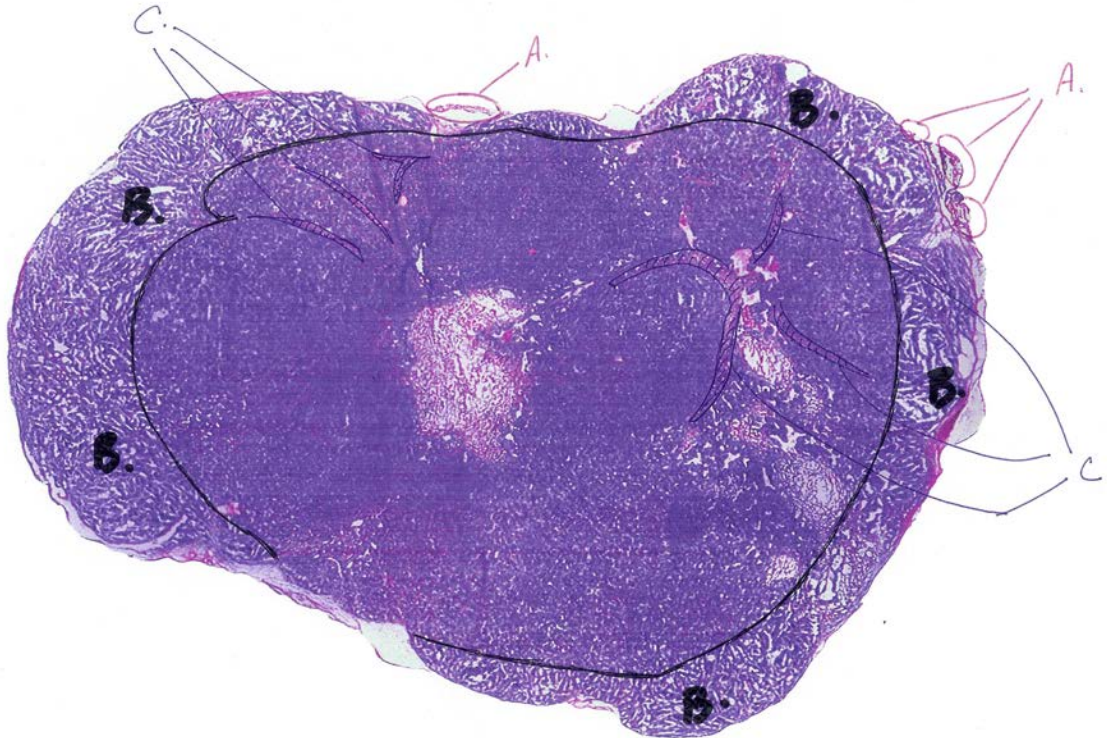

116  
117 **Supplementary Figure S10. A (red).** Small peripheral areas of adherent skeletal muscle are  
118 noted, as marked. **B (black).** All of tissue has moderate frozen section artifact, more pronounced  
119 artifact peripherally, as marked. **C (blue).** All of tissue has delicate intersecting fibrous tissue.  
120 Larger fibrous septa are as marked. Sheet #1.

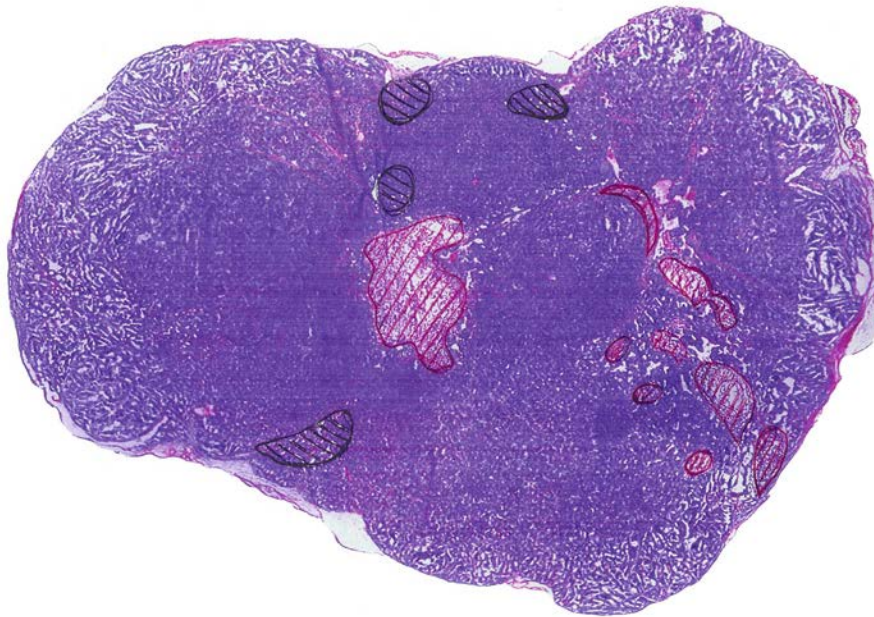

 = A.  
 = B.

121  
122 **Supplementary Figure S11. A (red).** Variable sized zones of tumor necrosis (with apoptotic  
123 bodies and cell ghosts) are present. **B (black).** Architecture is variable with most areas showing  
124 *very* poorly-formed glandular structures along the delicate intersecting fibrous tissue. Areas with  
125 *slightly* better formed glandular structures are as marked. Sheet #2.

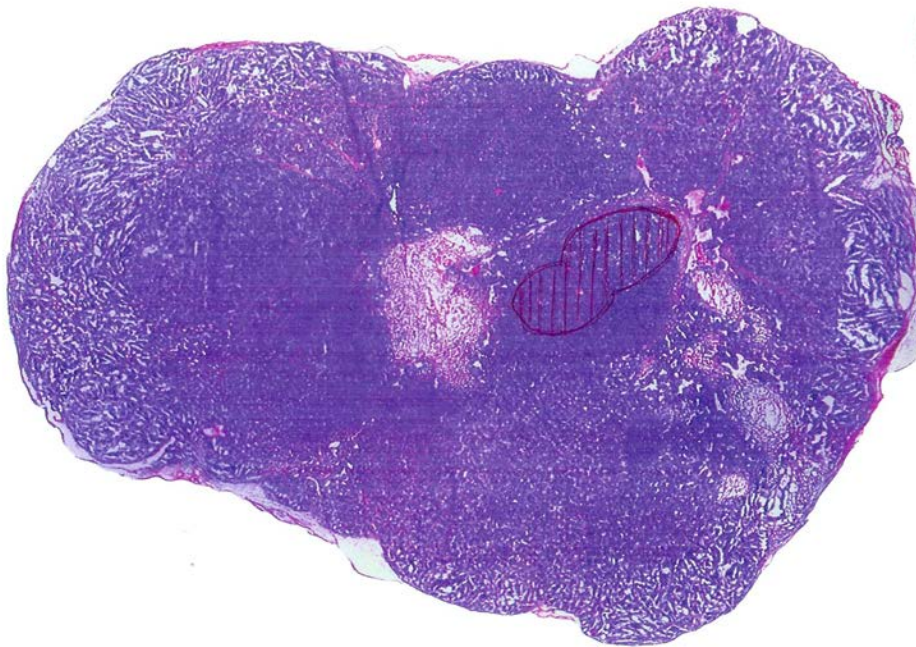

 = A.

126  
127 **Supplementary Figure S12. A (red).** Most of the tumor is composed of intermediate to large  
128 sized cells with moderate pleomorphism. One area shows marked pleomorphism with “bizarre”  
129 nuclei and cells with multiple nuclei. Sheet #3.

130

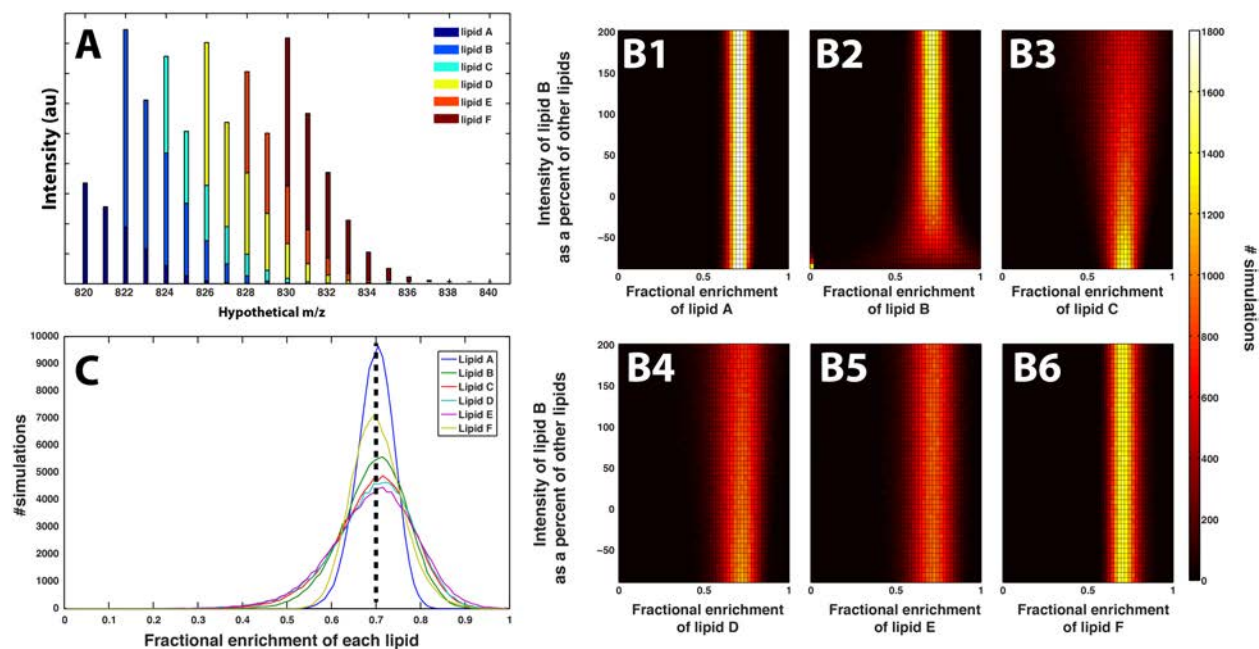

131  
 132  
 133 **Supplementary Figure S13.** Sensitivity analysis to examine the influence of relative  
 134 abundance of a particular lipid species on calculated isotopic enrichment of other lipids. Six  
 135 hypothetical lipids (denoted A-F) were considered for this simulation. **(Panel A)** Contribution of  
 136 each lipid to the total spectrum. **(Panels B and C)** Lipid B's relative abundance (intensity) was  
 137 varied while all other lipids were held constant. All lipids were held at a constant fractional  
 138 enrichment (0.7) and the intensity of lipid B was varied from near zero to 200% (y-axis). In  
 139 Panel B, the average fractional enrichment (x-axis) remains centered at 0.7. In Panel C,  
 140 integration of each lipid over all intensities of B results in Gaussian distributions also centered at  
 141 0.7. [Simulation details: Each fit was performed 10,000 times with the addition of a random  
 142 amount of noise. The noise added or subtracted to each peak was from a random number  
 143 generated from a Gaussian distribution, and a generous amount (5%) of noise was used for these  
 144 simulations. The hypothetic lipids were simulated as diacyl phosphocholine lipids differing in  
 145 their degree of saturation.]

146 **Supplementary References**

147  
148 1. Turner, S.M. et al. Measurement of TG synthesis and turnover in vivo by  $2\text{H}_2\text{O}$  incorporation into the  
149 glycerol moiety and application of MIDA. *American journal of physiology. Endocrinology and metabolism*  
150 **285**, E790-803 (2003).  
151 2. Lee, W.N.P. et al. In-Vivo Measurement of Fatty-Acids and Cholesterol-Synthesis Using  $\text{D}_2\text{O}$  and Mass  
152 Isotopomer Analysis. *Am J Physiol* **266**, E699-E708 (1994).  
153 3. Diraison, F., Pachiaudi, C. & Beylot, M. In vivo measurement of plasma cholesterol and fatty acid  
154 synthesis with deuterated water: determination of the average number of deuterium atoms incorporated.  
155 *Metabolism: clinical and experimental* **45**, 817-821 (1996).  
156  
157
